# Supplementary material for: Comprehensive Analysis of Lymph Nodes Metastasis Associated Genes in Cervical Cancer and its Significance in Treatment and Prognosis
Source: Research Square preprint supplement (doi:10.21203/rs.3.rs-763079/v1), 2021-08-31
Supplement: Supplementary file 1 [file cc5ebcbf135f8c7b2a9e42e9.csv]

gene	immune_cells	cor	p.value
LPIN2	B cells naive	0.353729152886679	0.000121335598475804
LPIN2	T cells CD8	0.236725663716814	0.0117461555141794
LPIN2	NK cells resting	-0.134098526604516	0.156763280930874
LPIN2	Macrophages M0	-0.0988097911554501	0.297766749958879
LPIN2	Dendritic cells activated	-0.140781627789738	0.136933550075239
LPIN2	Neutrophils	-0.000166868269688365	0.998600422453934
TEKT2	B cells naive	0.350130542376864	0.000143752293351412
TEKT2	T cells CD8	0.156264555193293	0.0983392251833349
TEKT2	NK cells resting	-0.0056329561385936	0.952781791328673
TEKT2	Macrophages M0	-0.0962563731516855	0.310487458990503
TEKT2	Dendritic cells activated	-0.0448378275053439	0.637233447582277
TEKT2	Neutrophils	-0.0115490407705369	0.903368663397471
CXCL2	B cells naive	0.0947969635697398	0.31791458529248
CXCL2	T cells CD8	-0.0961890345332358	0.310337478908233
CXCL2	NK cells resting	0.180114808001409	0.0562618722666422
CXCL2	Macrophages M0	0.00459116201328354	0.961507177110676
CXCL2	Dendritic cells activated	0.260512769029889	0.00532332609723358
CXCL2	Neutrophils	0.411145851431112	6.07811124417932e-06
FABP4	B cells naive	-0.108067364097775	0.254561661658607
FABP4	T cells CD8	-0.197692793931732	0.0359786039810065
FABP4	NK cells resting	-0.0621074833075082	0.51343253698714
FABP4	Macrophages M0	0.223760926890158	0.0171975771082303
FABP4	Dendritic cells activated	-0.0332873036665368	0.726329996497693
FABP4	Neutrophils	0.0247667642379574	0.794565269959144
